# Supplementary material
Source: Springer Nature journal article supplement (https://www.springermedizin.de/resource/supplementary/12883_2011_540_MOESM1_ESM.pdf/9455362)

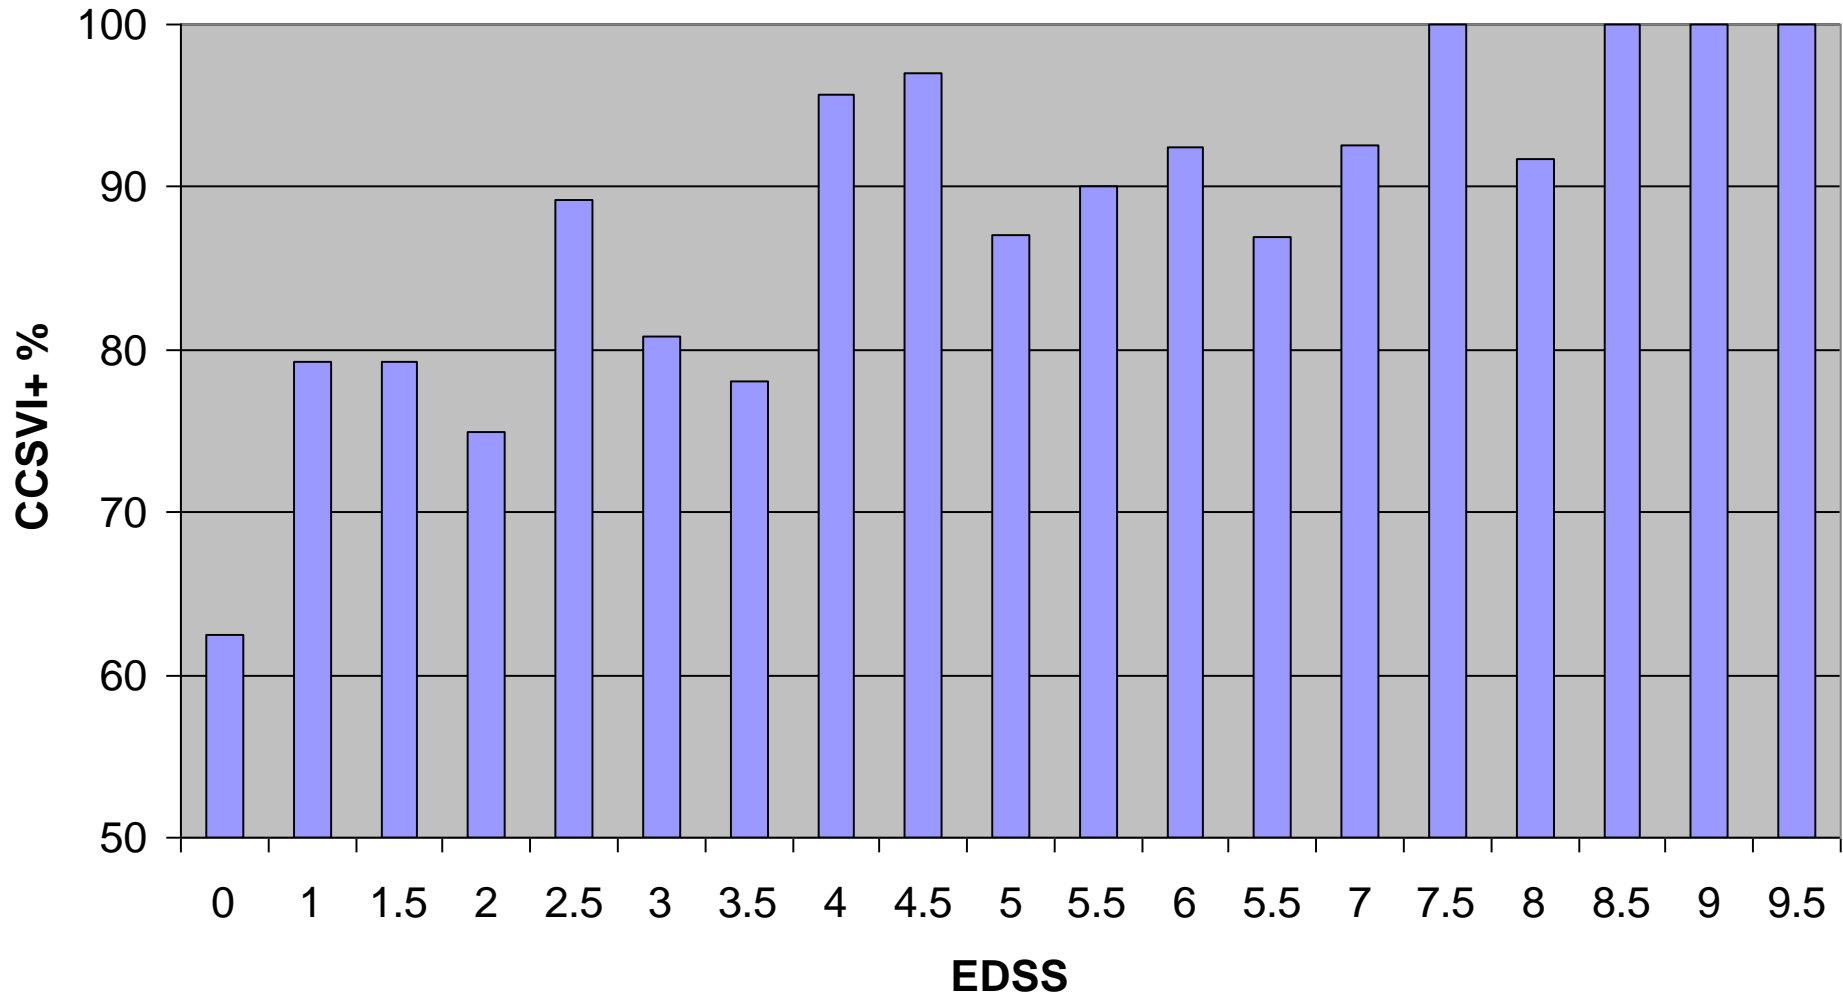

Supplement: MOESM1 [file 9455362]
